# Supplementary material for: Hydrothermal trace metal release and microbial metabolism in the Northeast Lau Basin of the south Pacific Ocean
Source: Copernicus journal article supplement (doi:10.5194/bg-2021-96), 2021-04-22
Supplement: Supplementary file 1 [file bg-2021-96-supplement.zip]

Archive with 3 entries (3 files):
- Supplemental Information.pdf
- TableS1.xlsx
- TableS2.xlsx
