# Supplementary material for: Hydrothermal trace metal release and microbial metabolism in the Northeast Lau Basin of the south Pacific Ocean
Source: Copernicus journal article supplement (doi:10.5194/bg-2021-96), 2021-04-22
Supplement: Supplementary file 1 [file bg-2021-96-supplement.zip › TableS1.xlsx]

## Sheet: Sheet1
Station	Latitude	Longitude	Depth (m)	Flow meter volume (L)	Filter size (µm)	Protein (µg/L)
1	17	-154.4	50	282	3	4.14184
1	17	-154.4	90	223	3	5.56054
1	17	-154.4	120	911	3	1.30845
1	17	-154.4	200	456	3	0.350877
1	17	-154.4	300	294	3	1.80952
1	17	-154.4	400	340	3	0.776471
1	17	-154.4	600	307	3	0.338762
3	8	-156	40	324	3	4.49383
3	8	-156	60	946	3	1.73784
3	8	-156	120	591	3	2.88325
3	8	-156	150	496	3	1.91129
3	8	-156	200	859	3	0.521537
3	8	-156	250	581	3	1.27367
3	8	-156	300	686	3	0.641399
3	8	-156	400	585	3	0.861538
3	8	-156	500	482	3	0.788382
3	8	-156	550	346	3	0.33526
3	8	-156	600	833	3	0.0864346
3	8	-156	800	859	3	0.088475
5	0	-157.99	20	390	3	13.0256
5	0	-157.99	50	290	3	16.4552
5	0	-157.99	80	1009	3	1.93062
5	0	-157.99	120	411	3	2.98783
5	0	-157.99	200	524	3	0.824427
5	0	-157.99	300	325	3	0.873846
5	0	-157.99	400	1141	3	0.143734
5	0	-157.99	500	555	3	1.18919
5	0	-157.99	600	1127	3	0.418811
6	-3.5	-160.77	40	229	3	7.24891
6	-3.5	-160.77	80	165	3	9.91515
6	-3.5	-160.77	200	898	3	0.0757238
8	-9.25	-165.36	40	227	3	14.0969
8	-9.25	-165.36	70	179	3	8.51397
8	-9.25	-165.36	200	822	3	0.335766
9	-12	-167.56	40	196	3	10.1633
9	-12	-167.56	70	212	3	4.98113
9	-12	-167.56	380	843	3	0.109134
12	-15	-173.1	40	362	3	4.62983
12	-15	-173.1	120	277	3	4.80866
12	-15	-173.1	300	1384	3	0.138728
12	-15	-173.1	1900	178	3	0.516854
